# Supplementary material for: Tandem repeats ubiquitously flank and select translation initiation sites.
Source: Research Square preprint supplement (doi:10.21203/rs.3.rs-832312/v1), 2021-08-31
Supplement: Supplementary file 1 [file 194c4ba638726c180fd6e4d1.xlsx]

## Sheet: category 1
	Suppl. 2: The list of all human genes and their Ensembl gene ID, which contained human-specific TRs in their TIS-flanking sequence for categories 1.
			Gene Name	Ensemble Gene ID
			A1BG	(ENSG00000121410)
			A2ML1	(ENSG00000166535)
			AAAS	(ENSG00000094914)
			ABCB11	(ENSG00000073734)
			ABCB11	(ENSG00000276582)
			ABCC10	(ENSG00000124574)
			ABCF1	(ENSG00000204574)
			ABCF1	(ENSG00000236149)
			ABCF1	(ENSG00000236342)
			ABCF1	(ENSG00000225989)
			ABCF1	(ENSG00000232169)
			ABCF1	(ENSG00000231129)
			ABCF1	(ENSG00000206490)
			ABHD14A-ACY1	(ENSG00000114786).
			ABHD3	(ENSG00000158201)
			ABHD4	(ENSG00000100439)
			ABI3BP	(ENSG00000154175)
			AC000120.4	(ENSG00000285953)
			AC002996.1	(ENSG00000257767)
			AC003002.2	(ENSG00000268533)
			AC004080.3	(ENSG00000257184)
			AC004223.3	(ENSG00000267618)
			AC004556.3	(ENSG00000276345)
			AC004691.2	(ENSG00000250424)
			AC004706.3	(ENSG00000282936)
			AC004832.3	(ENSG00000249590)
			AC004922.1	(ENSG00000284292)
			AC005551.1	(ENSG00000284638)
			AC005726.1	(ENSG00000258472)
			AC006449.4	(ENSG00000277005)
			AC006486.1	(ENSG00000268643)
			AC006538.2	(ENSG00000267001)
			AC007040.2	(ENSG00000258881)
			AC007325.1	(ENSG00000276017)
			AC007325.2	(ENSG00000277196)
			AC007325.4	(ENSG00000278817)
			AC007326.4	(ENSG00000283809)
			AC007906.2	(ENSG00000277639)
			AC007998.2	(ENSG00000267140)
			AC008162.2	(ENSG00000278646)
			AC008397.1	(ENSG00000284797)
			AC008687.1	(ENSG00000267335)
			AC008758.1	(ENSG00000196826)
			AC008758.5	(ENSG00000268870)
			AC008764.4	(ENSG00000268790)
			AC008878.1	(ENSG00000267952)
			AC008982.1	(ENSG00000268083)
			AC008982.3	(ENSG00000282832)
			AC009412.1	(ENSG00000286075)
			AC009779.3	(ENSG00000258311)
			AC009879.2	(ENSG00000285655)
			AC010325.1	(ENSG00000261341)
			AC010531.1	(ENSG00000131152)
			AC010646.1	(ENSG00000269095)
			AC010724.2	(ENSG00000282755)
			AC011005.1	(ENSG00000230626)
			AC011043.1	(ENSG00000276256)
			AC011043.2	(ENSG00000278198)
			AC011195.2	(ENSG00000266826)
			AC011455.2	(ENSG00000269547)
			AC011455.3	(ENSG00000282835)
			AC011462.1	(ENSG00000255730)
			AC011841.1	(ENSG00000273496)
			AC012213.5	(ENSG00000285982)
			AC012314.10	(ENSG00000276260)
			AC012314.14	(ENSG00000277667)
			AC012314.17	(ENSG00000277996)
			AC012314.18	(ENSG00000278363)
			AC012314.5	(ENSG00000274873)
			AC012314.7	(ENSG00000274905)
			AC012488.2	(ENSG00000286165)
			AC012531.3	(ENSG00000273049)
			AC013470.2	(ENSG00000226690)
			AC013477.2	(ENSG00000288637)
			AC013489.1	(ENSG00000173867)
			AC018709.1	(ENSG00000272297)
			AC019117.3	(ENSG00000283321)
			AC021072.1	(ENSG00000283536)
			AC023491.2	(ENSG00000278633)
			AC024592.3	(ENSG00000267740)
			AC024598.1	(ENSG00000285837)
			AC024940.6	(ENSG00000275428)
			AC025287.4	(ENSG00000284484)
			AC026369.8	(ENSG00000282676)
			AC026464.4	(ENSG00000260914)
			AC026464.6	(ENSG00000272617)
			AC037459.1	(ENSG00000248235)
			AC037482.2	(ENSG00000262731)
			AC037482.3	(ENSG00000266286)
			AC044810.8	(ENSG00000284476)
			AC048338.2	(ENSG00000284934)
			AC058822.1	(ENSG00000282278)
			AC068533.4	(ENSG00000249319)
			AC068580.4	(ENSG00000250644)
			AC068775.1	(ENSG00000255641)
			AC068870.4	(ENSG00000288625)
			AC069368.1	(ENSG00000249240)
			AC069444.2	(ENSG00000285585)
			AC072022.2	(ENSG00000285938)
			AC073111.4	(ENSG00000284691)
			AC073896.1	(ENSG00000144785)
			AC079741.2	(ENSG00000288634)
			AC084756.2	(ENSG00000288645)
			AC090517.4	(ENSG00000285253)
			AC091304.7	(ENSG00000274700)
			AC092017.2	(ENSG00000283952)
			AC092042.3	(ENSG00000273291)
			AC092073.1	(ENSG00000266953)
			AC092329.3	(ENSG00000283201)
			AC092442.1	(ENSG00000284684)
			AC092587.1	(ENSG00000273155)
			AC092647.5	(ENSG00000249773)
			AC092854.1	(ENSG00000288319)
			AC093246.1	(ENSG00000288639)
			AC093323.1	(ENSG00000170846)
			AC093525.1	(ENSG00000259784)
			AC093668.1	(ENSG00000270249)
			AC093830.1	(ENSG00000262505)
			AC093899.2	(ENSG00000251569)
			AC097634.4	(ENSG00000285708)
			AC097637.1	(ENSG00000173366)
			AC098582.1	(ENSG00000287542)
			AC099489.1	(ENSG00000188897)
			AC099811.2	(ENSG00000267261)
			AC100868.1	(ENSG00000258417)
			AC104109.3	(ENSG00000272772)
			AC104389.6	(ENSG00000284931)
			AC106873.8	(ENSG00000288635)
			AC109583.1	(ENSG00000206549)
			AC114490.3	(ENSG00000284773)
			AC116366.2	(ENSG00000283782)
			AC117378.1	(ENSG00000285625)
			AC118282.7	(ENSG00000288184)
			AC126283.2	(ENSG00000285330)
			AC129492.3	(ENSG00000263620)
			AC131160.1	(ENSG00000283765)
			AC133551.1	(ENSG00000274175)
			AC134669.1	(ENSG00000265118)
			AC136352.3	(ENSG00000277666)
			AC136612.1	(ENSG00000275869)
			AC136616.1	(ENSG00000273554)
			AC136616.2	(ENSG00000277761)
			AC138696.1	(ENSG00000264668)
			AC138894.1	(ENSG00000261832)
			AC138969.1	(ENSG00000183889)
			AC141272.1	(ENSG00000277836)
			AC142525.4	(ENSG00000280514)
			AC187652.1	(ENSG00000288431)
			AC207056.1	(ENSG00000262748)
			AC207582.1	(ENSG00000288284)
			AC213203.1	(ENSG00000268674)
			AC213203.2	(ENSG00000277475)
			AC226007.1	(ENSG00000275798)
			AC231657.3	(ENSG00000288053)
			AC233723.1	(ENSG00000262165)
			AC233755.2	(ENSG00000277856)
			AC236040.1	(ENSG00000272000)
			AC236972.4	(ENSG00000278803)
			AC241401.1	(ENSG00000283826)
			AC241401.2	(ENSG00000284493)
			AC241410.1	(ENSG00000288373)
			AC241640.1	(ENSG00000283738)
			AC241640.2	(ENSG00000283892)
			AC242628.1	(ENSG00000288626)
			AC243734.1	(ENSG00000274542)
			AC243790.1	(ENSG00000276253)
			AC243837.3	(ENSG00000285013)
			AC243837.4	(ENSG00000285154)
			AC244489.1	(ENSG00000273807)
			AC245049.1	(ENSG00000276709)
			AC245175.1	(ENSG00000285059)
			AC245175.2	(ENSG00000288136)
			AC254560.1	(ENSG00000281757)
			AC254788.1	(ENSG00000282837)
			AC254945.2	(ENSG00000282168)
			AC254952.1	(ENSG00000282088)
			AC256203.1	(ENSG00000285362)
			AC256203.2	(ENSG00000285408)
			AC256230.1	(ENSG00000288282)
			AC256236.1	(ENSG00000284330)
			AC256236.2	(ENSG00000284454)
			AC269752.2	(ENSG00000288413)
			AC270091.1	(ENSG00000288432)
			AC270106.1	(ENSG00000288249)
			AC270107.1	(ENSG00000283963)
			AC270107.2	(ENSG00000283989)
			AC270107.3	(ENSG00000284036)
			AC270107.5	(ENSG00000284151)
			AC270107.6	(ENSG00000284230)
			AC270107.7	(ENSG00000284287)
			AC270107.9	(ENSG00000284434)
			AC270129.2	(ENSG00000288137)
			AC270129.4	(ENSG00000288480)
			AC270153.1	(ENSG00000288405)
			AC270156.1	(ENSG00000288164)
			AC270156.3	(ENSG00000288313)
			AC270227.1	(ENSG00000284445)
			AC270239.1	(ENSG00000283465)
			AC270239.2	(ENSG00000288423)
			AC270258.1	(ENSG00000284958)
			AC270272.1	(ENSG00000284798)
			AC270272.2	(ENSG00000285072)
			AC270273.1	(ENSG00000284907)
			AC270273.3	(ENSG00000285397)
			AC270285.1	(ENSG00000284811)
			AC270286.1	(ENSG00000285369)
			AC270300.1	(ENSG00000284913)
			AC270300.2	(ENSG00000284924)
			AC270301.3	(ENSG00000284927)
			AC275254.1	(ENSG00000288202)
			AC275284.2	(ENSG00000288173)
			AC275284.3	(ENSG00000288339)
			AC275284.4	(ENSG00000288440)
			AC275546.3	(ENSG00000288375)
			ACAD10	(ENSG00000111271)
			ACOT2	(ENSG00000119673)
			ACP6	(ENSG00000162836)
			ACSL6	(ENSG00000164398)
			ACSM2B	(ENSG00000066813)
			ACTR3C	(ENSG00000106526)
			ADA2	(ENSG00000093072)
			ADAD2	(ENSG00000140955)
			ADAM22	(ENSG00000008277)
			ADAM28	(ENSG00000042980)
			ADAMTS17	(ENSG00000140470)
			ADAMTSL1	(ENSG00000178031)
			ADAP1	(ENSG00000105963)
			ADAP2	(ENSG00000184060)
			ADCY3	(ENSG00000138031)
			ADGB	(ENSG00000118492)
			ADGRD2	(ENSG00000180264)
			ADGRE3	(ENSG00000131355)
			ADGRG6	(ENSG00000112414)
			ADNP	(ENSG00000101126)
			ADSS1	(ENSG00000185100)
			AEBP2	(ENSG00000139154)
			AF196969.1	(ENSG00000286268)
			AF241726.2	(ENSG00000250349)
			AFDN	(ENSG00000130396)
			AFTPH	(ENSG00000119844)
			AGAP4	(ENSG00000188234)
			AGAP5	(ENSG00000172650)
			AGER	(ENSG00000237405)
			AGER	(ENSG00000234729)
			AGER	(ENSG00000231268)
			AGER	(ENSG00000229058)
			AGER	(ENSG00000206320)
			AGER	(ENSG00000230514)
			AGER	(ENSG00000204305)
			AGFG1	(ENSG00000173744)
			AGFG2	(ENSG00000106351)
			AGTRAP	(ENSG00000177674)
			AHR	(ENSG00000106546)
			AHRR	(ENSG00000063438)
			AIFM1	(ENSG00000156709)
			AIG1	(ENSG00000146416)
			AK5	(ENSG00000154027)
			AK9	(ENSG00000155085)
			AKAP7	(ENSG00000118507)
			AKIP1	(ENSG00000166452)
			AKIRIN1	(ENSG00000174574)
			AKNA	(ENSG00000106948)
			AKR1B10	(ENSG00000198074)
			AKR7A3	(ENSG00000162482)
			AL021546.1	(ENSG00000111780)
			AL031178.1	(ENSG00000288614)
			AL031315.1	(ENSG00000285733)
			AL031681.3	(ENSG00000288000)
			AL034430.1	(ENSG00000285508)
			AL034430.2	(ENSG00000285723)
			AL035425.2	(ENSG00000260548)
			AL035460.1	(ENSG00000241690)
			AL049634.2	(ENSG00000260861)
			AL109811.3	(ENSG00000277726)
			AL110118.2	(ENSG00000259066)
			AL110118.4	(ENSG00000281847)
			AL121758.1	(ENSG00000270299)
			AL121845.3	(ENSG00000273154)
			AL121899.2	(ENSG00000286022)
			AL133173.4	(ENSG00000288261)
			AL133500.1	(ENSG00000285547)
			AL135905.2	(ENSG00000285976)
			AL136295.1	(ENSG00000254692)
			AL136295.15	(ENSG00000285502)
			AL136295.3	(ENSG00000259371)
			AL136295.9	(ENSG00000284818)
			AL139011.2	(ENSG00000258465)
			AL139300.1	(ENSG00000256500)
			AL157392.5	(ENSG00000282246)
			AL158151.3	(ENSG00000235007)
			AL159163.1	(ENSG00000249141)
			AL162596.1	(ENSG00000285946)
			AL163636.2	(ENSG00000259171)
			AL353579.1	(ENSG00000286105)
			AL357075.4	(ENSG00000288520)
			AL391987.2	(ENSG00000204805)
			AL441992.2	(ENSG00000286112)
			AL445238.1	(ENSG00000285566)
			AL445989.1	(ENSG00000237378)
			AL512785.2	(ENSG00000254706)
			AL513523.9	(ENSG00000269823)
			AL592183.1	(ENSG00000273748)
			AL603764.2	(ENSG00000286135)
			AL603832.3	(ENSG00000271810)
			AL645922.1	(ENSG00000244255)
			AL645941.2	(ENSG00000248993)
			AL662852.3	(ENSG00000274063)
			AL662884.4	(ENSG00000285085)
			AL672142.1	(ENSG00000251184)
			AL691442.2	(ENSG00000251246)
			AL772284.2	(ENSG00000277535)
			AL845331.1	(ENSG00000259916)
			AL929561.4	(ENSG00000278714)
			ALAS2	(ENSG00000158578)
			ALDH3B1	(ENSG00000006534)
			ALG13	(ENSG00000101901)
			ALG8	(ENSG00000159063)
			ALKAL2	(ENSG00000189292)
			ALOX12B	(ENSG00000179477)
			AMFR	(ENSG00000159461)
			AMN	(ENSG00000166126)
			AMOT	(ENSG00000126016)
			ANGPTL8	(ENSG00000130173)
			ANKHD1	(ENSG00000131503)
			ANKHD1-EIF4EBP3	(ENSG00000254996).
			ANKMY1	(ENSG00000144504)
			ANKRD11	(ENSG00000167522)
			ANKRD17	(ENSG00000132466)
			ANKRD20A1	(ENSG00000260691)
			ANKRD20A3P	(ENSG00000276203)
			ANKRD20A4P	(ENSG00000172014)
			ANKRD26	(ENSG00000107890)
			ANKRD36B	(ENSG00000196912)
			ANKRD40CL	(ENSG00000167117)
			ANKRD44	(ENSG00000065413)
			ANKRD54	(ENSG00000100124)
			ANKS1B	(ENSG00000185046)
			ANOS1	(ENSG00000011201)
			ANXA11	(ENSG00000122359)
			AOPEP	(ENSG00000148120)
			AP000295.1	(ENSG00000249624)
			AP000311.1	(ENSG00000249209)
			AP000350.12	(ENSG00000281287)
			AP000350.4	(ENSG00000251357)
			AP000351.3	(ENSG00000278401)
			AP000721.1	(ENSG00000256100)
			AP000781.2	(ENSG00000254979)
			AP001267.5	(ENSG00000285827)
			AP001458.2	(ENSG00000255432)
			AP001781.2	(ENSG00000258529)
			AP002495.1	(ENSG00000254469)
			AP002512.3	(ENSG00000284732)
			AP002748.5	(ENSG00000256349)
			AP006285.2	(ENSG00000276565)
			AP1B1	(ENSG00000100280)
			AP1M1	(ENSG00000072958)
			AP2A2	(ENSG00000281385)
			AP2A2	(ENSG00000183020)
			AP2A2	(ENSG00000280759)
			AP3M2	(ENSG00000070718)
			APEX1	(ENSG00000100823)
			APLP1	(ENSG00000105290)
			APOC4-APOC2	(ENSG00000224916)
			APOO	(ENSG00000184831)
			APP	(ENSG00000142192)
			APTX	(ENSG00000137074)
			AQP1	(ENSG00000240583)
			AQP12A	(ENSG00000184945)
			AQP12B	(ENSG00000185176)
			AQP7	(ENSG00000165269)
			ARHGAP28	(ENSG00000088756)
			ARHGAP33	(ENSG00000004777)
			ARHGAP4	(ENSG00000089820)
			ARHGAP42	(ENSG00000165895)
			ARHGAP6	(ENSG00000047648)
			ARHGAP8	(ENSG00000241484)
			ARHGEF18	(ENSG00000104880)
			ARID3B	(ENSG00000179361)
			ARID4A	(ENSG00000032219)
			ARID4B	(ENSG00000054267)
			ARL13A	(ENSG00000174225)
			ARL16	(ENSG00000214087)
			ARMC5	(ENSG00000140691)
			ARPIN-AP3S2	(ENSG00000250021)
			ARSI	(ENSG00000183876)
			AS3MT	(ENSG00000214435)
			ASAH2B	(ENSG00000204147)
			ASB18	(ENSG00000182177)
			ASB9	(ENSG00000102048)
			ASGR1	(ENSG00000141505)
			ASIC1	(ENSG00000110881)
			ASIC3	(ENSG00000213199)
			ASPSCR1	(ENSG00000169696)
			ASRGL1	(ENSG00000162174)
			ASXL1	(ENSG00000171456)
			ATAD2	(ENSG00000156802)
			ATF3	(ENSG00000162772)
			ATF5	(ENSG00000169136)
			ATF7	(ENSG00000170653)
			ATF7IP2	(ENSG00000166669)
			ATF7-NPFF	(ENSG00000267281)
			ATG13	(ENSG00000175224)
			ATG2A	(ENSG00000110046)
			ATG3	(ENSG00000144848)
			ATOX1	(ENSG00000177556)
			ATP13A4	(ENSG00000127249)
			ATP5F1A	(ENSG00000152234)
			ATP5MF-PTCD1	(ENSG00000248919).
			ATP5MGL	(ENSG00000249222)
			ATP5PO	(ENSG00000241837)
			ATP6V0A1	(ENSG00000033627)
			ATP6V0B	(ENSG00000117410)
			ATP8A2	(ENSG00000132932)
			ATXN10	(ENSG00000130638)
			ATXN2	(ENSG00000204842)
			AURKC	(ENSG00000105146)
			AUTS2	(ENSG00000158321)
			AXDND1	(ENSG00000162779)
			AXL	(ENSG00000167601)
			BAG6	(ENSG00000228760)
			BAG6	(ENSG00000227761)
			BAG6	(ENSG00000234651)
			BAG6	(ENSG00000233348)
			BAG6	(ENSG00000229524)
			BAG6	(ENSG00000204463)
			BAG6	(ENSG00000096155)
			BAP1	(ENSG00000163930)
			BATF2	(ENSG00000168062)
			BAZ2A	(ENSG00000076108)
			BBS1	(ENSG00000174483)
			BBX	(ENSG00000114439)
			BCAP29	(ENSG00000283852)
			BCAP29	(ENSG00000075790)
			BCKDHA	(ENSG00000248098)
			BCL2L10	(ENSG00000137875)
			BCLAF3	(ENSG00000173681)
			BCORL1	(ENSG00000085185)
			BDH1	(ENSG00000275544)
			BDH1	(ENSG00000161267)
			BECN1	(ENSG00000126581)
			BEST1	(ENSG00000167995)
			BEST2	(ENSG00000039987)
			BLOC1S1	(ENSG00000135441)
			BLOC1S5	(ENSG00000188428)
			BMP4	(ENSG00000125378)
			BMP8A	(ENSG00000183682)
			BNIP2	(ENSG00000140299)
			BOD1	(ENSG00000145919)
			BOD1L1	(ENSG00000038219)
			BPI	(ENSG00000101425)
			BPNT1	(ENSG00000162813)
			BPY2	(ENSG00000183753)
			BPY2B	(ENSG00000183795)
			BPY2C	(ENSG00000185894)
			BRAF	(ENSG00000157764)
			BRCA1	(ENSG00000012048)
			BRD2	(ENSG00000204256)
			BRD2	(ENSG00000235307)
			BRD2	(ENSG00000236227)
			BRD2	(ENSG00000234507)
			BRD2	(ENSG00000234704)
			BRD2	(ENSG00000215077)
			BRD3OS	(ENSG00000235106)
			BRMS1	(ENSG00000174744)
			BST1	(ENSG00000109743)
			BTBD2	(ENSG00000133243)
			BTD	(ENSG00000169814)
			BTF3	(ENSG00000145741)
			BTN2A1	(ENSG00000112763)
			BTN3A2	(ENSG00000186470)
			BUD23	(ENSG00000071462)
			BX248413.1	(ENSG00000278450)
			BX664615.2	(ENSG00000283886)
			C10orf67	(ENSG00000179133)
			C11orf65	(ENSG00000166323)
			C11orf80	(ENSG00000173715)
			C11orf91	(ENSG00000205177)
			C11orf98	(ENSG00000278615)
			C12orf42	(ENSG00000179088)
			C12orf71	(ENSG00000214700)
			C16orf74	(ENSG00000154102)
			C16orf82	(ENSG00000234186)
			C16orf86	(ENSG00000159761)
			C16orf92	(ENSG00000167194)
			C17orf49	(ENSG00000258315)
			C17orf64	(ENSG00000141371)
			C19orf12	(ENSG00000131943)
			C19orf38	(ENSG00000214212)
			C19orf47	(ENSG00000160392)
			C19orf54	(ENSG00000188493)
			C19orf57	(ENSG00000288152)
			C19orf57	(ENSG00000132016)
			C19orf84	(ENSG00000262874)
			C1orf105	(ENSG00000180999)
			C1orf116	(ENSG00000182795)
			C1orf122	(ENSG00000197982)
			C1orf127	(ENSG00000175262)
			C1orf167	(ENSG00000215910)
			C1orf185	(ENSG00000204006)
			C1orf198	(ENSG00000119280)
			C1orf226	(ENSG00000239887)
			C1RL	(ENSG00000288124)
			C1RL	(ENSG00000139178)
			C20orf141	(ENSG00000258713)
			C20orf173	(ENSG00000125975)
			C20orf203	(ENSG00000198547)
			C21orf58	(ENSG00000160298)
			C21orf62	(ENSG00000205929)
			C21orf62	(ENSG00000262938)
			C22orf15	(ENSG00000169314)
			C22orf15	(ENSG00000273579)
			C2CD2	(ENSG00000157617)
			C2CD5	(ENSG00000111731)
			C2orf73	(ENSG00000177994)
			C2orf81	(ENSG00000284308)
			C3	(ENSG00000125730)
			C3orf20	(ENSG00000131379)
			C3orf62	(ENSG00000188315)
			C4A	(ENSG00000227746)
			C4A	(ENSG00000244207)
			C4A	(ENSG00000206340)
			C4A	(ENSG00000244731)
			C4B	(ENSG00000228454)
			C4B	(ENSG00000224389)
			C4B	(ENSG00000236625)
			C4B	(ENSG00000228267)
			C4B_2	(ENSG00000233312)
			C6orf136	(ENSG00000204564)
			C6orf136	(ENSG00000237012)
			C6orf136	(ENSG00000237100)
			C6orf136	(ENSG00000224120)
			C6orf136	(ENSG00000233164)
			C6orf136	(ENSG00000233641)
			C6orf136	(ENSG00000206487)
			C6orf223	(ENSG00000181577)
			C6orf52	(ENSG00000285312)
			C6orf52	(ENSG00000137434)
			C7orf50	(ENSG00000146540)
			C8orf44-SGK3	(ENSG00000288602).
			C8orf58	(ENSG00000241852)
			C8orf82	(ENSG00000213563)
			CA11	(ENSG00000063180)
			CA4	(ENSG00000167434)
			CAAP1	(ENSG00000120159)
			CABLES2	(ENSG00000149679)
			CABYR	(ENSG00000154040)
			CACNA1A	(ENSG00000141837)
			CACNA1F	(ENSG00000102001)
			CACNA1G	(ENSG00000006283)
			CACNB4	(ENSG00000182389)
			CAD	(ENSG00000084774)
			CAGE1	(ENSG00000164304)
			CALB2	(ENSG00000172137)
			CALB2	(ENSG00000282830)
			CALHM4	(ENSG00000164451)
			CAMK1D	(ENSG00000183049)
			CAMK2D	(ENSG00000145349)
			CANX	(ENSG00000127022)
			CANX	(ENSG00000283777)
			CAPN7	(ENSG00000131375)
			CAPNS2	(ENSG00000256812)
			CAPS2	(ENSG00000180881)
			CASP8	(ENSG00000064012)
			CATSPER2	(ENSG00000166762)
			CBFB	(ENSG00000067955)
			CBL	(ENSG00000110395)
			CBR4	(ENSG00000145439)
			CBS	(ENSG00000160200)
			CBSL	(ENSG00000274276)
			CBWD1	(ENSG00000172785)
			CBWD5	(ENSG00000147996)
			CBWD6	(ENSG00000215126)
			CBX3	(ENSG00000122565)
			CC2D2B	(ENSG00000188649)
			CCAR1	(ENSG00000060339)
			CCBE1	(ENSG00000183287)
			CCDC110	(ENSG00000168491)
			CCDC136	(ENSG00000128596)
			CCDC169-SOHLH2	(ENSG00000250709)
			CCDC173	(ENSG00000154479)
			CCDC18	(ENSG00000122483)
			CCDC25	(ENSG00000147419)
			CCDC33	(ENSG00000288407)
			CCDC33	(ENSG00000140481)
			CCDC38	(ENSG00000165972)
			CCDC58	(ENSG00000160124)
			CCDC63	(ENSG00000173093)
			CCDC68	(ENSG00000166510)
			CCDC91	(ENSG00000123106)
			CCER2	(ENSG00000262484)
			CCER2	(ENSG00000283099)
			CCHCR1	(ENSG00000224180)
			CCHCR1	(ENSG00000234114)
			CCHCR1	(ENSG00000223533)
			CCHCR1	(ENSG00000206355)
			CCHCR1	(ENSG00000206457)
			CCHCR1	(ENSG00000204536)
			CCL14	(ENSG00000276409)
			CCL14	(ENSG00000277236)
			CCL3L3	(ENSG00000276085)
			CCL4L2	(ENSG00000276125)
			CCL4L2	(ENSG00000275313)
			CCL4L2	(ENSG00000282604)
			CCL4L2	(ENSG00000276070)
			CCNI	(ENSG00000118816)
			CCSER1	(ENSG00000184305)
			CCT3	(ENSG00000163468)
			CD163L1	(ENSG00000177675)
			CD1B	(ENSG00000158485)
			CD1D	(ENSG00000158473)
			CD1E	(ENSG00000158488)
			CD200	(ENSG00000091972)
			CD226	(ENSG00000150637)
			CD37	(ENSG00000104894)
			CD3EAP	(ENSG00000117877)
			CD44	(ENSG00000026508)
			CD46	(ENSG00000117335)
			CD55	(ENSG00000196352)
			CD58	(ENSG00000116815)
			CD8B2	(ENSG00000254126)
			CDC123	(ENSG00000151465)
			CDCA2	(ENSG00000184661)
			CDH11	(ENSG00000140937)
			CDH23	(ENSG00000107736)
			CDHR3	(ENSG00000128536)
			CDHR4	(ENSG00000187492)
			CDK11A	(ENSG00000008128)
			CDK13	(ENSG00000065883)
			CDK16	(ENSG00000102225)
			CDK5RAP1	(ENSG00000101391)
			CDRT1	(ENSG00000241322)
			CEACAM1	(ENSG00000079385)
			CEACAM21	(ENSG00000007129)
			CEACAM21	(ENSG00000278565)
			CEACAM5	(ENSG00000105388)
			CELF4	(ENSG00000101489)
			CELF6	(ENSG00000140488)
			CEND1	(ENSG00000184524)
			CENPJ	(ENSG00000151849)
			CEP170	(ENSG00000143702)
			CEP295NL	(ENSG00000178404)
			CEP55	(ENSG00000138180)
			CEP57L1	(ENSG00000183137)
			CEP76	(ENSG00000101624)
			CERCAM	(ENSG00000167123)
			CERS5	(ENSG00000139624)
			CERT1	(ENSG00000113163)
			CES4A	(ENSG00000172824)
			CFAP298	(ENSG00000159079)
			CFAP298-TCP10L	(ENSG00000265590).
			CFAP46	(ENSG00000171811)
			CFAP47	(ENSG00000165164)
			CFAP61	(ENSG00000089101)
			CFAP92	(ENSG00000114656)
			CFB	(ENSG00000241534)
			CFB	(ENSG00000239754)
			CFB	(ENSG00000243570)
			CFB	(ENSG00000243649)
			CFB	(ENSG00000242335)
			CFB	(ENSG00000204359)
			CFB	(ENSG00000241253)
			CFHR1	(ENSG00000244414)
			CGB1	(ENSG00000267631)
			CGB2	(ENSG00000104818)
			CGB3	(ENSG00000104827)
			CGB5	(ENSG00000189052)
			CGB7	(ENSG00000196337)
			CGB8	(ENSG00000213030)
			CHADL	(ENSG00000100399)
			CHAF1A	(ENSG00000167670)
			CHD2	(ENSG00000173575)
			CHD3	(ENSG00000170004)
			CHD5	(ENSG00000116254)
			CHI3L1	(ENSG00000133048)
			CHL1	(ENSG00000134121)
			CHMP2B	(ENSG00000083937)
			CHMP4A	(ENSG00000285302)
			CHMP4A	(ENSG00000254505)
			CHMP6	(ENSG00000176108)
			CHN1	(ENSG00000128656)
			CHN2	(ENSG00000106069)
			CHRDL2	(ENSG00000054938)
			CHRNA6	(ENSG00000147434)
			CHRNA7	(ENSG00000175344)
			CHRNB3	(ENSG00000147432)
			CHST11	(ENSG00000171310)
			CHST5	(ENSG00000135702)
			CIAO2B	(ENSG00000166595)
			CIB1	(ENSG00000185043)
			CIBAR1	(ENSG00000188343)
			CIZ1	(ENSG00000148337)
			CKB	(ENSG00000166165)
			CKLF-CMTM1	(ENSG00000254788)
			CLCC1	(ENSG00000121940)
			CLEC10A	(ENSG00000132514)
			CLEC18A	(ENSG00000157322)
			CLEC20A	(ENSG00000188585)
			CLEC2D	(ENSG00000069493)
			CLEC4A	(ENSG00000111729)
			CLEC4C	(ENSG00000198178)
			CLIP2	(ENSG00000106665)
			CLN3	(ENSG00000188603)
			CLN5	(ENSG00000102805)
			CNBD1	(ENSG00000176571)
			CNBD2	(ENSG00000149646)
			CNGB3	(ENSG00000170289)
			CNOT3	(ENSG00000274616)
			CNOT3	(ENSG00000277114)
			CNOT3	(ENSG00000277615)
			CNOT3	(ENSG00000277600)
			CNOT3	(ENSG00000274176)
			CNOT3	(ENSG00000275979)
			CNOT3	(ENSG00000274941)
			CNOT3	(ENSG00000273943)
			CNOT3	(ENSG00000088038)
			CNOT3	(ENSG00000276082)
			CNOT8	(ENSG00000155508)
			CNTNAP3B	(ENSG00000154529)
			CNTRL	(ENSG00000119397)
			CNTROB	(ENSG00000170037)
			COA8	(ENSG00000256053)
			COG5	(ENSG00000164597)
			COG5	(ENSG00000284369)
			COL3A1	(ENSG00000168542)
			COL4A2	(ENSG00000134871)
			COL4A5	(ENSG00000188153)
			COL7A1	(ENSG00000114270)
			COLCA2	(ENSG00000214290)
			COMMD1	(ENSG00000173163)
			COMMD3	(ENSG00000148444)
			COMMD3-BMI1	(ENSG00000269897)
			COMP	(ENSG00000105664)
			COP1	(ENSG00000143207)
			COPA	(ENSG00000122218)
			COPB2	(ENSG00000184432)
			COPRS	(ENSG00000172301)
			COPS9	(ENSG00000172428)
			COQ10A	(ENSG00000135469)
			COQ5	(ENSG00000110871)
			COQ9	(ENSG00000088682)
			CORO1A	(ENSG00000102879)
			CORO7	(ENSG00000262246)
			CORO7	(ENSG00000282725)
			CORO7-PAM16	(ENSG00000278760)
			CORO7-PAM16	(ENSG00000103426)
			CPAMD8	(ENSG00000160111)
			CPD	(ENSG00000108582)
			CPE	(ENSG00000109472)
			CPED1	(ENSG00000106034)
			CPNE7	(ENSG00000178773)
			CR388407.1	(ENSG00000275606)
			CR547123.1	(ENSG00000277403)
			CR589904.2	(ENSG00000286015)
			CR753845.2	(ENSG00000269167)
			CR759815.2	(ENSG00000258002)
			CR847794.2	(ENSG00000257215)
			CR933783.1	(ENSG00000274733)
			CRACR2A	(ENSG00000130038)
			CREB5	(ENSG00000146592)
			CRELD1	(ENSG00000163703)
			CRIM1	(ENSG00000150938)
			CRIM1	(ENSG00000277354)
			CRIPT	(ENSG00000119878)
			CROCC	(ENSG00000058453)
			CRYAA2	(ENSG00000276076)
			CSAG1	(ENSG00000198930)
			CSAG2	(ENSG00000268902)
			CSAG3	(ENSG00000268916)
			CSH1	(ENSG00000136488)
			CSH2	(ENSG00000213218)
			CSHL1	(ENSG00000204414)
			CSNK1E	(ENSG00000213923)
			CSNK1G1	(ENSG00000169118)
			CT45A1	(ENSG00000268940)
			CT45A2	(ENSG00000271449)
			CT45A3	(ENSG00000269096)
			CT45A5	(ENSG00000228836)
			CT45A6	(ENSG00000278289)
			CT45A7	(ENSG00000273696)
			CT45A8	(ENSG00000278085)
			CT45A9	(ENSG00000270946)
			CT476828.1	(ENSG00000283767)
			CT476828.10	(ENSG00000284025)
			CT476828.11	(ENSG00000284066)
			CT476828.12	(ENSG00000284156)
			CT476828.13	(ENSG00000284174)
			CT476828.14	(ENSG00000284181)
			CT476828.15	(ENSG00000284210)
			CT476828.16	(ENSG00000284262)
			CT476828.17	(ENSG00000284383)
			CT476828.18	(ENSG00000284475)
			CT476828.19	(ENSG00000284496)
			CT476828.2	(ENSG00000283820)
			CT476828.20	(ENSG00000284502)
			CT476828.21	(ENSG00000284507)
			CT476828.3	(ENSG00000283830)
			CT476828.4	(ENSG00000283878)
			CT476828.5	(ENSG00000283884)
			CT476828.6	(ENSG00000283893)
			CT476828.7	(ENSG00000283898)
			CT476828.8	(ENSG00000283955)
			CT476828.9	(ENSG00000284002)
			CTAG1A	(ENSG00000268651)
			CTAG1B	(ENSG00000184033)
			CTC1	(ENSG00000178971)
			CTCF	(ENSG00000102974)
			CTDSPL	(ENSG00000144677)
			CTH	(ENSG00000116761)
			CTNND1	(ENSG00000198561)
			CTRB1	(ENSG00000168925)
			CTRB1	(ENSG00000285346)
			CTRB2	(ENSG00000284810)
			CTRB2	(ENSG00000168928)
			CTSC	(ENSG00000109861)
			CTSF	(ENSG00000174080)
			CTSK	(ENSG00000143387)
			CUBN	(ENSG00000107611)
			CUEDC1	(ENSG00000180891)
			CYBC1	(ENSG00000178927)
			CYP11B1	(ENSG00000160882)
			CYP26B1	(ENSG00000003137)
			CYP2D7	(ENSG00000283373)
			CYP2F1	(ENSG00000197446)
			CYP3A7	(ENSG00000160870)
			CYP3A7-CYP3A51P	(ENSG00000282301)
			CYP4A11	(ENSG00000187048)
			CYP4F12	(ENSG00000186204)
			CYP4F2	(ENSG00000186115)
			CYTH1	(ENSG00000108669)
			CYTIP	(ENSG00000115165)
			DAB2IP	(ENSG00000136848)
			DACH2	(ENSG00000126733)
			DACT2	(ENSG00000164488)
			DAO	(ENSG00000110887)
			DAXX	(ENSG00000206279)
			DAXX	(ENSG00000206206)
			DAXX	(ENSG00000204209)
			DAXX	(ENSG00000227046)
			DAXX	(ENSG00000231617)
			DBNL	(ENSG00000136279)
			DCAF13	(ENSG00000164934)
			DCAF15	(ENSG00000288453)
			DCAF15	(ENSG00000132017)
			DCN	(ENSG00000011465)
			DCTN2	(ENSG00000175203)
			DDI2	(ENSG00000197312)
			DDX19A	(ENSG00000168872)
			DDX3X	(ENSG00000215301)
			DDX42	(ENSG00000198231)
			DDX59	(ENSG00000118197)
			DECR1	(ENSG00000104325)
			DEFB106B	(ENSG00000275794)
			DEFB106B	(ENSG00000187082)
			DEFB106B	(ENSG00000284937)
			DEFB130A	(ENSG00000285249)
			DEFB130A	(ENSG00000232948)
			DEFB130B	(ENSG00000233050)
			DEFB135	(ENSG00000205883)
			DEFB135	(ENSG00000285365)
			DENND4C	(ENSG00000137145)
			DEPDC4	(ENSG00000166153)
			DGCR6	(ENSG00000183628)
			DGKD	(ENSG00000077044)
			DGKD	(ENSG00000280873)
			DGKQ	(ENSG00000145214)
			DHFR	(ENSG00000228716)
			DHPS	(ENSG00000095059)
			DHRS11	(ENSG00000275397)
			DHRS11	(ENSG00000278535)
			DHRS2	(ENSG00000100867)
			DHRS4L2	(ENSG00000187630)
			DHRS7B	(ENSG00000109016)
			DHRS7C	(ENSG00000184544)
			DHRSX	(ENSG00000169084)
			DHX57	(ENSG00000163214)
			DIP2C	(ENSG00000151240)
			DIS3L2	(ENSG00000144535)
			DISP1	(ENSG00000154309)
			DKKL1	(ENSG00000104901)
			DLGAP2	(ENSG00000198010)
			DLGAP2	(ENSG00000282318)
			DMPK	(ENSG00000104936)
			DNAAF1	(ENSG00000154099)
			DNAAF3	(ENSG00000167646)
			DNAH12	(ENSG00000174844)
			DNAI1	(ENSG00000122735)
			DNAJA4	(ENSG00000140403)
			DNAJB12	(ENSG00000148719)
			DNAJC25-GNG10	(ENSG00000244115).
			DNAJC7	(ENSG00000168259)
			DNASE1	(ENSG00000213918)
			DOC2A	(ENSG00000149927)
			DOK2	(ENSG00000147443)
			DOK5	(ENSG00000101134)
			DOK6	(ENSG00000206052)
			DPAGT1	(ENSG00000172269)
			DPEP2	(ENSG00000167261)
			DPH1	(ENSG00000108963)
			DPH6	(ENSG00000134146)
			DPP3	(ENSG00000254986)
			DPP9	(ENSG00000142002)
			DPYS	(ENSG00000147647)
			DPYSL4	(ENSG00000151640)
			DRC7	(ENSG00000159625)
			DUS4L-BCAP29	(ENSG00000288558)
			DUSP15	(ENSG00000149599)
			DUSP6	(ENSG00000139318)
			DYRK4	(ENSG00000010219)
			DZIP1L	(ENSG00000158163)
			EAPP	(ENSG00000129518)
			ECHDC3	(ENSG00000134463)
			EDC4	(ENSG00000038358)
			EEF1AKMT3	(ENSG00000123427)
			EEF1AKNMT	(ENSG00000010165)
			EEF1D	(ENSG00000104529)
			EEF1E1	(ENSG00000124802)
			EEF2	(ENSG00000167658)
			EFCAB12	(ENSG00000172771)
			EFCAB2	(ENSG00000203666)
			EFCAB5	(ENSG00000176927)
			EFEMP1	(ENSG00000115380)
			EFHC1	(ENSG00000096093)
			EGLN1	(ENSG00000135766)
			EHBP1	(ENSG00000115504)
			EHMT2	(ENSG00000227333)
			EHMT2	(ENSG00000238134)
			EHMT2	(ENSG00000236759)
			EHMT2	(ENSG00000232045)
			EHMT2	(ENSG00000206376)
			EHMT2	(ENSG00000204371)
			EHMT2	(ENSG00000224143)
			EID3	(ENSG00000255150)
			EIF3E	(ENSG00000104408)
			EIF3H	(ENSG00000147677)
			EIF3K	(ENSG00000178982)
			EIF3K	(ENSG00000282986)
			EIF3L	(ENSG00000100129)
			EIF4A1	(ENSG00000161960)
			EIF4A3	(ENSG00000141543)
			EIF4E1B	(ENSG00000175766)
			EIF5AL1	(ENSG00000253626)
			ELMO1	(ENSG00000155849)
			ELOA3	(ENSG00000288631)
			ELOA3B	(ENSG00000288607)
			ELOB	(ENSG00000103363)
			ELP4	(ENSG00000109911)
			EMC7	(ENSG00000134153)
			EMCN	(ENSG00000164035)
			EMID1	(ENSG00000186998)
			ENAH	(ENSG00000154380)
			ENO1	(ENSG00000074800)
			ENOSF1	(ENSG00000132199)
			EOGT	(ENSG00000163378)
			EOLA1	(ENSG00000197620)
			EOLA2	(ENSG00000197021)
			EPB41L1	(ENSG00000088367)
			EPB41L4B	(ENSG00000095203)
			EPHA6	(ENSG00000080224)
			EPHA8	(ENSG00000070886)
			EPM2AIP1	(ENSG00000178567)
			EPPIN	(ENSG00000101448)
			EPPIN-WFDC6	(ENSG00000249139)
			EPS15L1	(ENSG00000127527)
			EPSTI1	(ENSG00000133106)
			ERC1	(ENSG00000082805)
			ERFE	(ENSG00000178752)
			ERV3-1	(ENSG00000213462)
			ERVK3-1	(ENSG00000142396)
			ERVW-1	(ENSG00000242950)
			ESCO1	(ENSG00000141446)
			ESPNL	(ENSG00000144488)
			ETNK2	(ENSG00000143845)
			EVI5L	(ENSG00000142459)
			EVPLL	(ENSG00000214860)
			EVPLL	(ENSG00000284166)
			EXOSC4	(ENSG00000178896)
			EXOSC5	(ENSG00000077348)
			EXTL3	(ENSG00000012232)
			F8A1	(ENSG00000277203)
			F8A2	(ENSG00000274791)
			F8A3	(ENSG00000277150)
			FADS3	(ENSG00000221968)
			FAIM2	(ENSG00000135472)
			FAM122C	(ENSG00000156500)
			FAM126A	(ENSG00000122591)
			FAM133B	(ENSG00000234545)
			FAM149B1	(ENSG00000138286)
			FAM153B	(ENSG00000182230)
			FAM189A2	(ENSG00000135063)
			FAM193B	(ENSG00000146067)
			FAM227B	(ENSG00000166262)
			FAM228A	(ENSG00000186453)
			FAM229A	(ENSG00000225828)
			FAM234A	(ENSG00000167930)
			FAM236A	(ENSG00000275520)
			FAM236B	(ENSG00000268994)
			FAM236C	(ENSG00000283594)
			FAM236D	(ENSG00000225396)
			FAM241B	(ENSG00000171224)
			FAM243A	(ENSG00000222018)
			FAM243B	(ENSG00000277277)
			FAM47E	(ENSG00000189157)
			FAM47E-STBD1	(ENSG00000272414).
			FAM53C	(ENSG00000120709)
			FAM72A	(ENSG00000196550)
			FAM72B	(ENSG00000188610)
			FAM76B	(ENSG00000077458)
			FAM83G	(ENSG00000188522)
			FAM86B1	(ENSG00000186523)
			FAM86B2	(ENSG00000145002)
			FAM90A1	(ENSG00000171847)
			FAM90A10P	(ENSG00000285950)
			FAM90A14P	(ENSG00000285814)
			FAM90A16P	(ENSG00000285620)
			FAM90A17P	(ENSG00000285720)
			FAM90A18P	(ENSG00000285913)
			FAM90A19P	(ENSG00000285657)
			FAM90A22P	(ENSG00000285687)
			FAM90A23P	(ENSG00000285795)
			FAM90A23P	(ENSG00000285765)
			FAM90A7P	(ENSG00000285832)
			FAM90A7P	(ENSG00000285975)
			FAM90A8P	(ENSG00000285937)
			FAM90A9P	(ENSG00000285607)
			FAM90A9P	(ENSG00000285962)
			FAM98B	(ENSG00000171262)
			FAM9C	(ENSG00000187268)
			FANCM	(ENSG00000187790)
			FARP1	(ENSG00000152767)
			FAT1	(ENSG00000083857)
			FBXL16	(ENSG00000127585)
			FBXL19	(ENSG00000099364)
			FBXL6	(ENSG00000285442)
			FBXL6	(ENSG00000182325)
			FBXL7	(ENSG00000183580)
			FBXO24	(ENSG00000106336)
			FCGR1B	(ENSG00000198019)
			FCGR3B	(ENSG00000162747)
			FCHSD1	(ENSG00000197948)
			FDFT1	(ENSG00000079459)
			FDPS	(ENSG00000160752)
			FDX2	(ENSG00000267673)
			FEM1B	(ENSG00000169018)
			FERMT1	(ENSG00000101311)
			FERMT2	(ENSG00000073712)
			FETUB	(ENSG00000090512)
			FEZ2	(ENSG00000171055)
			FGF7	(ENSG00000140285)
			FGG	(ENSG00000171557)
			FHAD1	(ENSG00000142621)
			FICD	(ENSG00000198855)
			FIP1L1	(ENSG00000145216)
			FKBP11	(ENSG00000134285)
			FKBP1A	(ENSG00000088832)
			FKBP1C	(ENSG00000198225)
			FKBP4	(ENSG00000004478)
			FKBP8	(ENSG00000105701)
			FLACC1	(ENSG00000155749)
			FLG	(ENSG00000143631)
			FLG2	(ENSG00000143520)
			FLT3LG	(ENSG00000090554)
			FLYWCH1	(ENSG00000059122)
			FMNL3	(ENSG00000161791)
			FMR1	(ENSG00000102081)
			FN3K	(ENSG00000167363)
			FO393400.1	(ENSG00000285382)
			FOLR3	(ENSG00000110203)
			FOS	(ENSG00000170345)
			FOXK1	(ENSG00000164916)
			FOXN4	(ENSG00000139445)
			FOXO3B	(ENSG00000240445)
			FOXP1	(ENSG00000114861)
			FOXP4	(ENSG00000137166)
			FP565260.1	(ENSG00000275464)
			FP565260.2	(ENSG00000276612)
			FP565260.4	(ENSG00000279493)
			FP565260.6	(ENSG00000280433)
			FRAS1	(ENSG00000138759)
			FRG2	(ENSG00000285063)
			FRG2	(ENSG00000285202)
			FRG2	(ENSG00000274972)
			FRG2	(ENSG00000205097)
			FRG2B	(ENSG00000225899)
			FRMD4A	(ENSG00000151474)
			FRY	(ENSG00000073910)
			FRYL	(ENSG00000075539)
			FSTL3	(ENSG00000070404)
			FXYD6-FXYD2	(ENSG00000255245)
			GABARAPL1	(ENSG00000139112)
			GABRB2	(ENSG00000145864)
			GADD45B	(ENSG00000099860)
			GALK1	(ENSG00000108479)
			GALNT8	(ENSG00000130035)
			GANAB	(ENSG00000089597)
			GARRE1	(ENSG00000166398)
			GARRE1	(ENSG00000279389)
			GARRE1	(ENSG00000282735)
			GARS1	(ENSG00000106105)
			GATAD2B	(ENSG00000143614)
			GATAD2B	(ENSG00000261992)
			GATD3B	(ENSG00000280071)
			GCA	(ENSG00000115271)
			GCHFR	(ENSG00000137880)
			GDA	(ENSG00000119125)
			GDF11	(ENSG00000135414)
			GDPD3	(ENSG00000102886)
			GEN1	(ENSG00000178295)
			GET1-SH3BGR	(ENSG00000285815)
			GFPT2	(ENSG00000131459)
			GGPS1	(ENSG00000152904)
			GIMAP5	(ENSG00000196329)
			GIPR	(ENSG00000010310)
			GJA5	(ENSG00000265107)
			GLCE	(ENSG00000138604)
			GLMN	(ENSG00000174842)
			GLMP	(ENSG00000198715)
			GLRX5	(ENSG00000182512)
			GLYR1	(ENSG00000140632)
			GM2A	(ENSG00000196743)
			GNAL	(ENSG00000141404)
			GNAS	(ENSG00000087460)
			GNL2	(ENSG00000134697)
			GNLY	(ENSG00000115523)
			GOLGA2	(ENSG00000167110)
			GOLGA6A	(ENSG00000159289)
			GOLGA6B	(ENSG00000215186)
			GOLGA6C	(ENSG00000167195)
			GOLGA6D	(ENSG00000140478)
			GOLGA6L1	(ENSG00000275009)
			GOLGA6L1	(ENSG00000273976)
			GOLGA6L1	(ENSG00000278247)
			GOLGA6L2	(ENSG00000174450)
			GOLGA6L22	(ENSG00000277865)
			GOLGA6L22	(ENSG00000274404)
			GOLGA6L4	(ENSG00000184206)
			GOLGA6L6	(ENSG00000277322)
			GOLGA6L7	(ENSG00000261649)
			GOLGA8A	(ENSG00000175265)
			GOLGA8B	(ENSG00000215252)
			GOLGA8DP	(ENSG00000288344)
			GOLGA8F	(ENSG00000276896)
			GOLGA8F	(ENSG00000153684)
			GOLGA8H	(ENSG00000261794)
			GOLGA8J	(ENSG00000179938)
			GOLGA8J	(ENSG00000278119)
			GOLGA8K	(ENSG00000249931)
			GOLGA8M	(ENSG00000188626)
			GOLGA8N	(ENSG00000283589)
			GOLGA8N	(ENSG00000232653)
			GOLGA8O	(ENSG00000206127)
			GOLGA8Q	(ENSG00000178115)
			GOLGA8Q	(ENSG00000282773)
			GOLGA8R	(ENSG00000186399)
			GOLGA8T	(ENSG00000261247)
			GOLGA8T	(ENSG00000284076)
			GOSR2	(ENSG00000108433)
			GOT1L1	(ENSG00000169154)
			GPM6B	(ENSG00000046653)
			GPN3	(ENSG00000111231)
			GPR108	(ENSG00000125734)
			GPR42	(ENSG00000126251)
			GPR89A	(ENSG00000117262)
			GPSM2	(ENSG00000121957)
			GPX3	(ENSG00000211445)
			GRAMD1C	(ENSG00000178075)
			GRAMD2A	(ENSG00000175318)
			GREM1	(ENSG00000276886)
			GREM1	(ENSG00000166923)
			GREM1	(ENSG00000282046)
			GRINA	(ENSG00000178719)
			GRIPAP1	(ENSG00000068400)
			GRM4	(ENSG00000124493)
			GRM5	(ENSG00000168959)
			GRP	(ENSG00000134443)
			GRWD1	(ENSG00000105447)
			GSDME	(ENSG00000105928)
			GSE1	(ENSG00000131149)
			GSK3A	(ENSG00000105723)
			GSTA5	(ENSG00000182793)
			GSTM2	(ENSG00000213366)
			GSTT1	(ENSG00000277656)
			GSTT2	(ENSG00000277897)
			GSTT2B	(ENSG00000133433)
			GSTT2B	(ENSG00000278695)
			GTF2A1L	(ENSG00000242441)
			GTF2H2C	(ENSG00000183474)
			GTF2H2C_2	(ENSG00000274675)
			GTF3C2	(ENSG00000115207)
			GTF3C3	(ENSG00000119041)
			GU182343.4	(ENSG00000277596)
			GYPB	(ENSG00000250361)
			GYPE	(ENSG00000197465)
			H2AC15	(ENSG00000275221)
			H2AC16	(ENSG00000276903)
			H2AC19	(ENSG00000272196)
			H2BW2	(ENSG00000101812)
			H3C1	(ENSG00000275714)
			H3C4	(ENSG00000197409)
			H3C6	(ENSG00000274750)
			H3Y1	(ENSG00000269466)
			H3Y2	(ENSG00000268799)
			H4C6	(ENSG00000274618)
			HACD2	(ENSG00000206527)
			HAGH	(ENSG00000063854)
			HAGHL	(ENSG00000103253)
			HAP1	(ENSG00000173805)
			HBA1	(ENSG00000206172)
			HBA2	(ENSG00000188536)
			HBP1	(ENSG00000105856)
			HBP1	(ENSG00000283847)
			HBS1L	(ENSG00000112339)
			HCFC1R1	(ENSG00000103145)
			HCN2	(ENSG00000099822)
			HDAC4	(ENSG00000068024)
			HDAC8	(ENSG00000147099)
			HDGFL2	(ENSG00000167674)
			HECTD1	(ENSG00000092148)
			HECTD2	(ENSG00000165338)
			HELZ2	(ENSG00000130589)
			HERC6	(ENSG00000138642)
			HES7	(ENSG00000179111)
			HGS	(ENSG00000185359)
			HHLA3	(ENSG00000197568)
			HIBCH	(ENSG00000198130)
			HID1	(ENSG00000167861)
			HLA-B	(ENSG00000228964)
			HLA-B	(ENSG00000224608)
			HLA-B	(ENSG00000223532)
			HLA-B	(ENSG00000232126)
			HLA-B	(ENSG00000206450)
			HLA-C	(ENSG00000204525)
			HLA-C	(ENSG00000225691)
			HLA-DMA	(ENSG00000243215)
			HLA-DMA	(ENSG00000239463)
			HLA-DMA	(ENSG00000243189)
			HLA-DMA	(ENSG00000242361)
			HLA-DMA	(ENSG00000243719)
			HLA-DMA	(ENSG00000204257)
			HLA-DMA	(ENSG00000241394)
			HLA-DMA	(ENSG00000242685)
			HLA-DMB	(ENSG00000239329)
			HLA-DMB	(ENSG00000241674)
			HLA-DMB	(ENSG00000226264)
			HLA-DMB	(ENSG00000234154)
			HLA-DMB	(ENSG00000242092)
			HLA-DMB	(ENSG00000242386)
			HLA-DMB	(ENSG00000241296)
			HLA-DMB	(ENSG00000242574)
			HLA-DPB1	(ENSG00000230763)
			HLA-DPB1	(ENSG00000226826)
			HLA-DPB1	(ENSG00000237710)
			HLA-DPB1	(ENSG00000236693)
			HLA-DPB1	(ENSG00000223865)
			HLA-DPB1	(ENSG00000229295)
			HLA-DPB1	(ENSG00000230708)
			HLA-DPB1	(ENSG00000215048)
			HLA-DRB1	(ENSG00000206240)
			HLA-DRB1	(ENSG00000206306)
			HLA-DRB3	(ENSG00000196101)
			HLA-DRB3	(ENSG00000231679)
			HLA-DRB3	(ENSG00000230463)
			HLA-DRB4	(ENSG00000227357)
			HLA-DRB4	(ENSG00000231021)
			HLA-DRB4	(ENSG00000227826)
			HLA-F	(ENSG00000237508)
			HLA-F	(ENSG00000235220)
			HLA-F	(ENSG00000234487)
			HLA-F	(ENSG00000137403)
			HLA-F	(ENSG00000206509)
			HM190170.1	(ENSG00000284298)
			HMCN2	(ENSG00000148357)
			HMG20A	(ENSG00000140382)
			HMGN1	(ENSG00000205581)
			HMSD	(ENSG00000221887)
			HNRNPA1P48	(ENSG00000224578)
			HNRNPA3	(ENSG00000170144)
			HNRNPD	(ENSG00000138668)
			HNRNPL	(ENSG00000104824)
			HNRNPL	(ENSG00000282947)
			HOXB8	(ENSG00000120068)
			HPR	(ENSG00000261701)
			HRC	(ENSG00000130528)
			HS1BP3	(ENSG00000118960)
			HS6ST2	(ENSG00000171004)
			HSF4	(ENSG00000102878)
			HSFX1	(ENSG00000171116)
			HSFX2	(ENSG00000268738)
			HSPB7	(ENSG00000173641)
			HSPD1	(ENSG00000144381)
			HSPG2	(ENSG00000142798)
			HTR3B	(ENSG00000149305)
			HTR3D	(ENSG00000186090)
			HUS1B	(ENSG00000188996)
			HYI	(ENSG00000178922)
			IARS1	(ENSG00000196305)
			ICAM3	(ENSG00000076662)
			ICOSLG	(ENSG00000160223)
			IDH3G	(ENSG00000067829)
			IDI1	(ENSG00000067064)
			IFFO2	(ENSG00000169991)
			IFI16	(ENSG00000163565)
			IFI27L1	(ENSG00000276880)
			IFI27L1	(ENSG00000165948)
			IFITM10	(ENSG00000244242)
			IFITM10	(ENSG00000281618)
			IFNAR2	(ENSG00000159110)
			IFNGR1	(ENSG00000027697)
			IFNL3	(ENSG00000197110)
			IGHMBP2	(ENSG00000132740)
			IGLL1	(ENSG00000128322)
			IGSF1	(ENSG00000147255)
			IK	(ENSG00000113141)
			IL11	(ENSG00000095752)
			IL15RA	(ENSG00000134470)
			IL1RL1	(ENSG00000115602)
			IL2RG	(ENSG00000147168)
			IL32	(ENSG00000008517)
			ILKAP	(ENSG00000132323)
			INAFM1	(ENSG00000257704)
			INF2	(ENSG00000203485)
			ING3	(ENSG00000071243)
			INO80B	(ENSG00000115274)
			INPP5K	(ENSG00000132376)
			INSL3	(ENSG00000248099)
			INTS12	(ENSG00000138785)
			INTS7	(ENSG00000143493)
			IQCJ-SCHIP1	(ENSG00000283154)
			IQCK	(ENSG00000174628)
			IQSEC2	(ENSG00000124313)
			IRAK1BP1	(ENSG00000146243)
			ITGA2B	(ENSG00000005961)
			ITGAV	(ENSG00000138448)
			ITGB3	(ENSG00000259207)
			ITPR1	(ENSG00000150995)
			ITPRID2	(ENSG00000138434)
			ITSN1	(ENSG00000205726)
			JHY	(ENSG00000109944)
			JMJD4	(ENSG00000081692)
			JUND	(ENSG00000130522)
			KANK1	(ENSG00000107104)
			KANSL1	(ENSG00000120071)
			KANSL1	(ENSG00000275867)
			KANSL1	(ENSG00000278458)
			KARS1	(ENSG00000065427)
			KAT6A	(ENSG00000083168)
			KCNA2	(ENSG00000177301)
			KCNC1	(ENSG00000129159)
			KCNE1B	(ENSG00000276289)
			KCNH1	(ENSG00000143473)
			KCNK10	(ENSG00000100433)
			KCNQ2	(ENSG00000075043)
			KCNQ2	(ENSG00000281151)
			KCNT1	(ENSG00000107147)
			KCP	(ENSG00000135253)
			KCTD13	(ENSG00000174943)
			KCTD19	(ENSG00000168676)
			KDM1A	(ENSG00000004487)
			KDM1B	(ENSG00000165097)
			KHSRP	(ENSG00000088247)
			KIAA0513	(ENSG00000135709)
			KIAA0586	(ENSG00000100578)
			KIAA0930	(ENSG00000100364)
			KIAA1109	(ENSG00000138688)
			KIAA1191	(ENSG00000122203)
			KIAA1217	(ENSG00000120549)
			KIAA1614	(ENSG00000135835)
			KIDINS220	(ENSG00000134313)
			KIF12	(ENSG00000136883)
			KIF13B	(ENSG00000197892)
			KIF16B	(ENSG00000089177)
			KIF1A	(ENSG00000130294)
			KIF27	(ENSG00000165115)
			KIF5A	(ENSG00000155980)
			KIR2DL2	(ENSG00000275960)
			KIR2DS2	(ENSG00000278300)
			KIR2DS4	(ENSG00000276154)
			KIR2DS4	(ENSG00000275353)
			KIR2DS4	(ENSG00000276634)
			KIR2DS4	(ENSG00000275731)
			KIR2DS4	(ENSG00000273526)
			KIR2DS4	(ENSG00000274947)
			KIR2DS4	(ENSG00000274957)
			KIR2DS4	(ENSG00000284264)
			KIR2DS4	(ENSG00000283882)
			KIR3DL3	(ENSG00000275433)
			KIR3DL3	(ENSG00000276196)
			KIR3DL3	(ENSG00000278723)
			KIR3DL3	(ENSG00000278729)
			KIR3DL3	(ENSG00000277552)
			KIR3DL3	(ENSG00000275062)
			KIR3DL3	(ENSG00000276328)
			KIR3DL3	(ENSG00000277620)
			KIR3DL3	(ENSG00000275172)
			KIR3DL3	(ENSG00000276433)
			KIR3DL3	(ENSG00000276572)
			KIR3DL3	(ENSG00000275513)
			KIR3DL3	(ENSG00000276806)
			KIR3DL3	(ENSG00000276930)
			KIR3DL3	(ENSG00000274254)
			KIR3DL3	(ENSG00000276875)
			KIR3DL3	(ENSG00000274394)
			KIR3DL3	(ENSG00000274556)
			KIR3DL3	(ENSG00000274511)
			KIR3DL3	(ENSG00000274480)
			KIR3DL3	(ENSG00000274639)
			KIR3DL3	(ENSG00000284104)
			KIR3DL3	(ENSG00000274786)
			KIR3DL3	(ENSG00000274763)
			KIR3DL3	(ENSG00000274724)
			KIR3DL3	(ENSG00000284086)
			KIR3DL3	(ENSG00000274696)
			KIR3DL3	(ENSG00000273502)
			KIR3DL3	(ENSG00000284127)
			KIR3DL3	(ENSG00000284371)
			KIR3DL3	(ENSG00000284480)
			KIR3DL3	(ENSG00000283875)
			KIR3DL3	(ENSG00000283823)
			KIR3DL3	(ENSG00000283966)
			KIR3DL3	(ENSG00000283915)
			KIR3DL3	(ENSG00000242019)
			KIR3DL3	(ENSG00000277028)
			KIR3DL3	(ENSG00000278490)
			KIR3DL3	(ENSG00000276084)
			KIR3DL3	(ENSG00000276086)
			KIR3DL3	(ENSG00000277392)
			KIR3DX1	(ENSG00000276848)
			KIR3DX1	(ENSG00000276033)
			KIR3DX1	(ENSG00000275918)
			KIRREL1	(ENSG00000183853)
			KLC1	(ENSG00000126214)
			KLHDC4	(ENSG00000104731)
			KLHL14	(ENSG00000197705)
			KLHL17	(ENSG00000187961)
			KLHL35	(ENSG00000149243)
			KLK11	(ENSG00000167757)
			KLRC4	(ENSG00000183542)
			KMT2A	(ENSG00000118058)
			KNOP1	(ENSG00000103550)
			KNSTRN	(ENSG00000128944)
			KP420440.1	(ENSG00000283716)
			KP420440.2	(ENSG00000284053)
			KP420441.2	(ENSG00000284033)
			KP420441.4	(ENSG00000284225)
			KP420444.2	(ENSG00000284555)
			KP420446.1	(ENSG00000288316)
			KRBA2	(ENSG00000184619)
			KRBOX1	(ENSG00000240747)
			KRT10	(ENSG00000186395)
			KRT23	(ENSG00000263309)
			KRT23	(ENSG00000108244)
			KRT31	(ENSG00000094796)
			KRT31	(ENSG00000262993)
			KRT73	(ENSG00000186049)
			KRT8	(ENSG00000170421)
			KRTAP10-1	(ENSG00000215455)
			KRTAP10-10	(ENSG00000221859)
			KRTAP10-12	(ENSG00000189169)
			KRTAP10-3	(ENSG00000212935)
			KRTAP2-1	(ENSG00000212725)
			KRTAP2-1	(ENSG00000261852)
			KRTAP2-2	(ENSG00000214518)
			KRTAP2-3	(ENSG00000262862)
			KRTAP2-3	(ENSG00000212724)
			KRTAP2-4	(ENSG00000263091)
			KRTAP2-4	(ENSG00000213417)
			KRTAP3-2	(ENSG00000263296)
			KRTAP3-2	(ENSG00000212900)
			KRTAP4-6	(ENSG00000198090)
			KRTAP5-1	(ENSG00000205869)
			KRTAP5-1	(ENSG00000280585)
			KRTAP5-1	(ENSG00000278210)
			KRTAP5-2	(ENSG00000205867)
			KRTAP5-2	(ENSG00000281533)
			KRTAP5-2	(ENSG00000278489)
			KRTCAP3	(ENSG00000157992)
			KTN1	(ENSG00000126777)
			KU645196.3	(ENSG00000284101)
			KU645196.4	(ENSG00000284169)
			KU645197.1	(ENSG00000283763)
			KYNU	(ENSG00000115919)
			L3MBTL1	(ENSG00000185513)
			LANCL1	(ENSG00000115365)
			LARGE2	(ENSG00000165905)
			LAS1L	(ENSG00000001497)
			LATS1	(ENSG00000131023)
			LCAT	(ENSG00000213398)
			LCE2D	(ENSG00000187223)
			LCE4A	(ENSG00000187170)
			LCN10	(ENSG00000187922)
			LDLRAD4	(ENSG00000168675)
			LEKR1	(ENSG00000197980)
			LGALS7B	(ENSG00000178934)
			LGALS7B	(ENSG00000282902)
			LGALS9	(ENSG00000168961)
			LHCGR	(ENSG00000138039)
			LILRA1	(ENSG00000275525)
			LILRA1	(ENSG00000274935)
			LILRA1	(ENSG00000104974)
			LILRA1	(ENSG00000277398)
			LILRA3	(ENSG00000276175)
			LILRA3	(ENSG00000275841)
			LILRA3	(ENSG00000273884)
			LILRA3	(ENSG00000278046)
			LILRB1	(ENSG00000277807)
			LILRB1	(ENSG00000274669)
			LILRB1	(ENSG00000104972)
			LILRB1	(ENSG00000277134)
			LILRB2	(ENSG00000131042)
			LILRB2	(ENSG00000275463)
			LILRB2	(ENSG00000276146)
			LILRB2	(ENSG00000274513)
			LINS1	(ENSG00000140471)
			LIX1	(ENSG00000145721)
			LLGL2	(ENSG00000073350)
			LMAN1L	(ENSG00000140506)
			LMBR1L	(ENSG00000139636)
			LMF1	(ENSG00000103227)
			LMLN2	(ENSG00000283654)
			LMNA	(ENSG00000160789)
			LMNTD1	(ENSG00000152936)
			LONRF1	(ENSG00000154359)
			LONRF1	(ENSG00000285360)
			LOXL2	(ENSG00000134013)
			LPA	(ENSG00000198670)
			LPP	(ENSG00000145012)
			LRBA	(ENSG00000198589)
			LRCH3	(ENSG00000186001)
			LRP1	(ENSG00000123384)
			LRP12	(ENSG00000147650)
			LRRC37A	(ENSG00000278742)
			LRRC37A	(ENSG00000176681)
			LRRC37A2	(ENSG00000274332)
			LRRC37A2	(ENSG00000277221)
			LRRC37A3	(ENSG00000176809)
			LRRC37A3	(ENSG00000275621)
			LRRC37B	(ENSG00000185158)
			LRRC49	(ENSG00000137821)
			LRRC6	(ENSG00000129295)
			LRRIQ3	(ENSG00000162620)
			LSAMP	(ENSG00000185565)
			LSG1	(ENSG00000041802)
			LSS	(ENSG00000160285)
			LSS	(ENSG00000281289)
			LST1	(ENSG00000204482)
			LTBP2	(ENSG00000119681)
			LY6G6C	(ENSG00000228859)
			LY6G6C	(ENSG00000236183)
			LY6G6C	(ENSG00000235452)
			LY6G6C	(ENSG00000228250)
			LY6G6C	(ENSG00000204421)
			LYRM1	(ENSG00000102897)
			LZIC	(ENSG00000162441)
			MAFIP	(ENSG00000274847)
			MAGEA2	(ENSG00000268606)
			MAGEA2B	(ENSG00000183305)
			MAGEA3	(ENSG00000221867)
			MAGEA6	(ENSG00000197172)
			MAGEA9B	(ENSG00000267978)
			MAGEB17	(ENSG00000182798)
			MAGEC1	(ENSG00000155495)
			MALRD1	(ENSG00000204740)
			MAN2A2	(ENSG00000196547)
			MANEAL	(ENSG00000185090)
			MAP1LC3B2	(ENSG00000258102)
			MAP3K11	(ENSG00000173327)
			MARCHF7	(ENSG00000136536)
			MARS1	(ENSG00000166986)
			MARVELD3	(ENSG00000140832)
			MAST1	(ENSG00000105613)
			MATN2	(ENSG00000132561)
			MATR3	(ENSG00000015479)
			MATR3	(ENSG00000280987)
			MAU2	(ENSG00000129933)
			MAZ	(ENSG00000103495)
			MBNL1	(ENSG00000152601)
			MCAT	(ENSG00000100294)
			MCU	(ENSG00000156026)
			MDC1	(ENSG00000228575)
			MDC1	(ENSG00000237095)
			MDC1	(ENSG00000225589)
			MDC1	(ENSG00000224587)
			MDC1	(ENSG00000234012)
			MDC1	(ENSG00000137337)
			MDC1	(ENSG00000231135)
			MDC1	(ENSG00000206481)
			MDGA2	(ENSG00000139915)
			MDM1	(ENSG00000111554)
			MED16	(ENSG00000175221)
			MED26	(ENSG00000105085)
			MEGF11	(ENSG00000157890)
			MEGF11	(ENSG00000277848)
			MEP1B	(ENSG00000141434)
			METTL17	(ENSG00000165792)
			METTL21C	(ENSG00000139780)
			METTL22	(ENSG00000067365)
			METTL2A	(ENSG00000087995)
			METTL2B	(ENSG00000165055)
			METTL3	(ENSG00000165819)
			MFAP3L	(ENSG00000198948)
			MFSD12	(ENSG00000161091)
			MG910335.1	(ENSG00000288236)
			MG910335.3	(ENSG00000288506)
			MG910336.1	(ENSG00000288147)
			MG910336.2	(ENSG00000288259)
			MG910337.3	(ENSG00000288416)
			MG910338.1	(ENSG00000288180)
			MG910338.3	(ENSG00000288438)
			MG910339.1	(ENSG00000288285)
			MGA	(ENSG00000174197)
			MIA2	(ENSG00000150527)
			MIA3	(ENSG00000154305)
			MIB2	(ENSG00000197530)
			MICA	(ENSG00000204520)
			MICA	(ENSG00000233051)
			MICA	(ENSG00000231225)
			MICAL2	(ENSG00000133816)
			MICAL3	(ENSG00000243156)
			MICALL1	(ENSG00000100139)
			MICB	(ENSG00000204516)
			MICB	(ENSG00000231179)
			MICB	(ENSG00000231372)
			MICOS10	(ENSG00000173436)
			MLLT10	(ENSG00000078403)
			MLXIP	(ENSG00000175727)
			MLXIP	(ENSG00000281178)
			MMP21	(ENSG00000154485)
			MMP24	(ENSG00000125966)
			MOB4	(ENSG00000115540)
			MOGS	(ENSG00000115275)
			MORF4L1	(ENSG00000185787)
			MORN1	(ENSG00000116151)
			MPDZ	(ENSG00000107186)
			MPHOSPH9	(ENSG00000051825)
			MPND	(ENSG00000008382)
			MPRIP	(ENSG00000133030)
			MRM3	(ENSG00000171861)
			MROH7	(ENSG00000184313)
			MRPL55	(ENSG00000162910)
			MRPS22	(ENSG00000175110)
			MRPS28	(ENSG00000147586)
			MRPS7	(ENSG00000125445)
			MRTFA	(ENSG00000196588)
			MS4A14	(ENSG00000166928)
			MS4A3	(ENSG00000149516)
			MS4A5	(ENSG00000166930)
			MS4A7	(ENSG00000166927)
			MS4A8	(ENSG00000166959)
			MSANTD3-TMEFF1	(ENSG00000251349)
			MSH5	(ENSG00000227314)
			MSH5	(ENSG00000230961)
			MSH5	(ENSG00000237333)
			MSH5	(ENSG00000235222)
			MSH5	(ENSG00000235569)
			MSH5	(ENSG00000230293)
			MSH5	(ENSG00000204410)
			MSH5	(ENSG00000233345)
			MSI2	(ENSG00000153944)
			MTARC1	(ENSG00000186205)
			MT-CO2	(ENSG00000198712)
			MTDH	(ENSG00000147649)
			MTHFR	(ENSG00000177000)
			MTLN	(ENSG00000175701)
			MTMR10	(ENSG00000166912)
			MTMR10	(ENSG00000277086)
			MTUS2	(ENSG00000132938)
			MUC12	(ENSG00000205277)
			MUC19	(ENSG00000205592)
			MUC2	(ENSG00000198788)
			MUC20	(ENSG00000277753)
			MUC20	(ENSG00000276583)
			MUC20	(ENSG00000275501)
			MUC20	(ENSG00000275430)
			MUC20	(ENSG00000274843)
			MUC20	(ENSG00000176945)
			MUC20	(ENSG00000281630)
			MUC20	(ENSG00000278114)
			MUC22	(ENSG00000261272)
			MUC4	(ENSG00000276613)
			MUC4	(ENSG00000273822)
			MUC4	(ENSG00000273984)
			MUC4	(ENSG00000278303)
			MUC4	(ENSG00000278468)
			MUC5AC	(ENSG00000215182)
			MUC5AC	(ENSG00000283158)
			MUC5B	(ENSG00000117983)
			MUCL1	(ENSG00000172551)
			MUCL3	(ENSG00000168631)
			MVB12A	(ENSG00000141971)
			MYBBP1A	(ENSG00000132382)
			MYCBPAP	(ENSG00000136449)
			MYH2	(ENSG00000125414)
			MYL7	(ENSG00000106631)
			MYO1B	(ENSG00000128641)
			MYO1E	(ENSG00000157483)
			MYT1L	(ENSG00000186487)
			N6AMT1	(ENSG00000156239)
			NAB1	(ENSG00000138386)
			NADK2	(ENSG00000152620)
			NAGLU	(ENSG00000108784)
			NAGPA	(ENSG00000103174)
			NANOS1	(ENSG00000188613)
			NANP	(ENSG00000170191)
			NARF	(ENSG00000141562)
			NBAS	(ENSG00000151779)
			NBPF11	(ENSG00000263956)
			NBPF19	(ENSG00000271383)
			NBPF26	(ENSG00000273136)
			NBPF4	(ENSG00000196427)
			NBPF6	(ENSG00000186086)
			NCAPG	(ENSG00000109805)
			NCBP3	(ENSG00000074356)
			NCKAP1L	(ENSG00000123338)
			NCL	(ENSG00000115053)
			NCOR2	(ENSG00000196498)
			NCSTN	(ENSG00000162736)
			NDRG1	(ENSG00000104419)
			NDUFAF8	(ENSG00000224877)
			NDUFB2	(ENSG00000090266)
			NECTIN2	(ENSG00000130202)
			NECTIN3	(ENSG00000177707)
			NEK10	(ENSG00000163491)
			NEK3	(ENSG00000136098)
			NELFCD	(ENSG00000101158)
			NELL2	(ENSG00000184613)
			NFE2L1	(ENSG00000082641)
			NFE2L2	(ENSG00000116044)
			NFIA	(ENSG00000162599)
			NFKBIA	(ENSG00000100906)
			NID2	(ENSG00000087303)
			NIFK	(ENSG00000155438)
			NIPSNAP2	(ENSG00000146729)
			NKAIN1	(ENSG00000084628)
			NKAIN4	(ENSG00000101198)
			NKPD1	(ENSG00000179846)
			NLRC5	(ENSG00000140853)
			NLRP2	(ENSG00000022556)
			NLRP2	(ENSG00000273992)
			NLRP4	(ENSG00000160505)
			NLRP7	(ENSG00000277776)
			NLRP7	(ENSG00000277786)
			NLRP7	(ENSG00000276804)
			NLRP7	(ENSG00000167634)
			NLRP7	(ENSG00000274174)
			NLRP7	(ENSG00000275483)
			NLRP7	(ENSG00000274571)
			NLRP7	(ENSG00000278173)
			NLRP7	(ENSG00000277071)
			NLRP7	(ENSG00000277179)
			NME4	(ENSG00000103202)
			NOBOX	(ENSG00000106410)
			NOBOX	(ENSG00000285328)
			NODAL	(ENSG00000156574)
			NOL11	(ENSG00000130935)
			NOL3	(ENSG00000140939)
			NOL4L	(ENSG00000197183)
			NOMO2	(ENSG00000185164)
			NOMO3	(ENSG00000103226)
			NOMO3	(ENSG00000278087)
			NONO	(ENSG00000147140)
			NOTCH2NLB	(ENSG00000286019)
			NOTCH2NLC	(ENSG00000286219)
			NOTCH2NLR	(ENSG00000286106)
			NOTUM	(ENSG00000185269)
			NOVA2	(ENSG00000104967)
			NPAS1	(ENSG00000130751)
			NPAS3	(ENSG00000151322)
			NPIPA1	(ENSG00000183426)
			NPIPA1	(ENSG00000281994)
			NPIPA2	(ENSG00000254852)
			NPIPA3	(ENSG00000224712)
			NPIPA3	(ENSG00000278308)
			NPIPA5	(ENSG00000183793)
			NPIPA7	(ENSG00000214967)
			NPIPA8	(ENSG00000214940)
			NPIPA9	(ENSG00000233024)
			NPIPB11	(ENSG00000254206)
			NPIPB12	(ENSG00000169203)
			NPIPB13	(ENSG00000198064)
			NPIPB13	(ENSG00000283855)
			NPIPB15	(ENSG00000196436)
			NPIPB2	(ENSG00000234719)
			NPIPB3	(ENSG00000169246)
			NPIPB4	(ENSG00000185864)
			NPIPB5	(ENSG00000243716)
			NPIPB5	(ENSG00000284218)
			NPIPB6	(ENSG00000198156)
			NPIPB7	(ENSG00000233232)
			NPIPB8	(ENSG00000255524)
			NPIPB9	(ENSG00000196993)
			NPLOC4	(ENSG00000182446)
			NPRL3	(ENSG00000103148)
			NPY1R	(ENSG00000164128)
			NPY4R2	(ENSG00000288157)
			NPY4R2	(ENSG00000264717)
			NRIP3	(ENSG00000175352)
			NRM	(ENSG00000228854)
			NRM	(ENSG00000228867)
			NRM	(ENSG00000236843)
			NRM	(ENSG00000235773)
			NRM	(ENSG00000137404)
			NRM	(ENSG00000234809)
			NRM	(ENSG00000206484)
			NRP1	(ENSG00000099250)
			NRXN1	(ENSG00000179915)
			NRXN2	(ENSG00000110076)
			NSMCE2	(ENSG00000156831)
			NT5C1B	(ENSG00000185013)
			NT5C1B-RDH14	(ENSG00000250741)
			NT5C3A	(ENSG00000122643)
			NUBP2	(ENSG00000095906)
			NUBPL	(ENSG00000151413)
			NUDT11	(ENSG00000196368)
			NUDT4	(ENSG00000173598)
			NUDT4B	(ENSG00000177144)
			NUP107	(ENSG00000111581)
			NUP214	(ENSG00000126883)
			NUP50	(ENSG00000093000)
			NUP85	(ENSG00000125450)
			NUTM2B	(ENSG00000188199)
			NUTM2F	(ENSG00000130950)
			NUTM2G	(ENSG00000188152)
			NVL	(ENSG00000143748)
			NXF2	(ENSG00000269405)
			NXF2B	(ENSG00000269437)
			NXPE3	(ENSG00000144815)
			NXT2	(ENSG00000101888)
			OAS1	(ENSG00000089127)
			OBSCN	(ENSG00000154358)
			OCEL1	(ENSG00000099330)
			OCM2	(ENSG00000135175)
			OGG1	(ENSG00000114026)
			OGN	(ENSG00000106809)
			OIP5	(ENSG00000104147)
			OLIG1	(ENSG00000184221)
			OMP	(ENSG00000254550)
			OPALIN	(ENSG00000197430)
			OPN1LW	(ENSG00000102076)
			OPN1MW	(ENSG00000268221)
			OPN1MW2	(ENSG00000166160)
			OPRPN	(ENSG00000171199)
			OR10AG1	(ENSG00000174970)
			OR10G8	(ENSG00000234560)
			OR10H5	(ENSG00000172519)
			OR10Q1	(ENSG00000180475)
			OR11H1	(ENSG00000130538)
			OR11H12	(ENSG00000257115)
			OR13C2	(ENSG00000276119)
			OR2A1	(ENSG00000285105)
			OR2A1	(ENSG00000221970)
			OR2A42	(ENSG00000212807)
			OR2A42	(ENSG00000284836)
			OR2J2	(ENSG00000226000)
			OR2J2	(ENSG00000204700)
			OR2J2	(ENSG00000226347)
			OR2J2	(ENSG00000225550)
			OR2J2	(ENSG00000234746)
			OR2J2	(ENSG00000196231)
			OR2J2	(ENSG00000231676)
			OR2J2	(ENSG00000232945)
			OR2T3	(ENSG00000196539)
			OR2T3	(ENSG00000278377)
			OR2T3	(ENSG00000277113)
			OR2T34	(ENSG00000183310)
			OR2T8	(ENSG00000177462)
			OR2W3	(ENSG00000238243)
			OR4C3	(ENSG00000176547)
			OR4F16	(ENSG00000284662)
			OR4F21	(ENSG00000176269)
			OR4F29	(ENSG00000284733)
			OR4F3	(ENSG00000230178)
			OR4K17	(ENSG00000176230)
			OR51A2	(ENSG00000205496)
			OR52I2	(ENSG00000226288)
			OR52R1	(ENSG00000279270)
			OR5M3	(ENSG00000174937)
			OR5T2	(ENSG00000181718)
			OR6C75	(ENSG00000187857)
			OR7E24	(ENSG00000237521)
			OR8G5	(ENSG00000255298)
			OR8U9	(ENSG00000281038)
			ORC6	(ENSG00000091651)
			OSCP1	(ENSG00000116885)
			OTOA	(ENSG00000155719)
			OTOGL	(ENSG00000165899)
			P3R3URF-PIK3R3	(ENSG00000278139).
			PA2G4	(ENSG00000170515)
			PABPC1	(ENSG00000070756)
			PABPC1L	(ENSG00000101104)
			PABPC3	(ENSG00000151846)
			PABPC4	(ENSG00000090621)
			PACRG	(ENSG00000112530)
			PACRGL	(ENSG00000163138)
			PAF1	(ENSG00000006712)
			PAGE2	(ENSG00000234068)
			PAGE2B	(ENSG00000238269)
			PAGE5	(ENSG00000158639)
			PAMR1	(ENSG00000149090)
			PANK2	(ENSG00000125779)
			PAOX	(ENSG00000148832)
			PAQR9	(ENSG00000188582)
			PARD3	(ENSG00000148498)
			PARL	(ENSG00000175193)
			PARN	(ENSG00000274829)
			PARN	(ENSG00000140694)
			PARP6	(ENSG00000137817)
			PARVB	(ENSG00000188677)
			PATJ	(ENSG00000132849)
			PBX3	(ENSG00000167081)
			PCDH1	(ENSG00000156453)
			PCDH11X	(ENSG00000102290)
			PCDH15	(ENSG00000150275)
			PCDH7	(ENSG00000169851)
			PCDHA10	(ENSG00000250120)
			PCDHA12	(ENSG00000251664)
			PCDHA13	(ENSG00000239389)
			PCDHA7	(ENSG00000204963)
			PCDHB14	(ENSG00000120327)
			PCDHB5	(ENSG00000113209)
			PCDHB6	(ENSG00000113211)
			PCDHB9	(ENSG00000177839)
			PCDHGC4	(ENSG00000242419)
			PCK2	(ENSG00000285241)
			PCK2	(ENSG00000100889)
			PCLO	(ENSG00000186472)
			PCMT1	(ENSG00000120265)
			PCSK6	(ENSG00000140479)
			PDCD7	(ENSG00000090470)
			PDE11A	(ENSG00000284741)
			PDE11A	(ENSG00000128655)
			PDE2A	(ENSG00000186642)
			PDE4B	(ENSG00000184588)
			PDE4D	(ENSG00000113448)
			PDE6B	(ENSG00000133256)
			PDE8B	(ENSG00000113231)
			PDGFRA	(ENSG00000134853)
			PDHA1	(ENSG00000131828)
			PDK1	(ENSG00000152256)
			PDK2	(ENSG00000005882)
			PDLIM4	(ENSG00000131435)
			PDXK	(ENSG00000160209)
			PDXP	(ENSG00000241360)
			PEBP4	(ENSG00000134020)
			PEG10	(ENSG00000242265)
			PELI2	(ENSG00000139946)
			PEX11B	(ENSG00000131779)
			PGA3	(ENSG00000229859)
			PGA4	(ENSG00000229183)
			PGA5	(ENSG00000256713)
			PGAP1	(ENSG00000197121)
			PGAP6	(ENSG00000129925)
			PGM5	(ENSG00000154330)
			PGRMC2	(ENSG00000164040)
			PHC3	(ENSG00000173889)
			PHF1	(ENSG00000225553)
			PHF1	(ENSG00000112511)
			PHF20	(ENSG00000025293)
			PHF21A	(ENSG00000135365)
			PHF21B	(ENSG00000056487)
			PHF3	(ENSG00000118482)
			PHF8	(ENSG00000172943)
			PHGR1	(ENSG00000233041)
			PHLDB3	(ENSG00000176531)
			PHOX2A	(ENSG00000165462)
			PIAS2	(ENSG00000078043)
			PIEZO1	(ENSG00000103335)
			PIGG	(ENSG00000174227)
			PIGQ	(ENSG00000007541)
			PIGZ	(ENSG00000119227)
			PIH1D1	(ENSG00000104872)
			PIK3CB	(ENSG00000051382)
			PIM1	(ENSG00000137193)
			PIP5K1A	(ENSG00000143398)
			PITHD1	(ENSG00000057757)
			PJA1	(ENSG00000181191)
			PJVK	(ENSG00000204311)
			PKD1L1	(ENSG00000158683)
			PKP3	(ENSG00000184363)
			PLA2G1B	(ENSG00000170890)
			PLA2G2A	(ENSG00000188257)
			PLAAT5	(ENSG00000168004)
			PLAGL1	(ENSG00000118495)
			PLAUR	(ENSG00000011422)
			PLCB1	(ENSG00000182621)
			PLCZ1	(ENSG00000139151)
			PLEC	(ENSG00000178209)
			PLEKHA4	(ENSG00000105559)
			PLEKHM2	(ENSG00000116786)
			PLGLB1	(ENSG00000183281)
			PLGLB2	(ENSG00000125551)
			PLIN1	(ENSG00000166819)
			PLIN3	(ENSG00000105355)
			PLK1	(ENSG00000166851)
			PLK4	(ENSG00000142731)
			PLPBP	(ENSG00000147471)
			PLPP5	(ENSG00000147535)
			PLSCR3	(ENSG00000284009)
			PLSCR3	(ENSG00000187838)
			PLXNB3	(ENSG00000198753)
[truncated: 963 more rows]

## Sheet: category 2
	Suppl. 2: The list of all human genes and their Ensembl gene ID, which contained human-specific TRs in their TIS-flanking sequence for categories 2.
			Gene Name	Ensemble Gene ID
			ACSL6	(ENSG00000164398)
			AURKC	(ENSG00000105146)
			BCL2L10	(ENSG00000137875)
			BUD23	(ENSG00000071462)
			CDH23	(ENSG00000107736)
			CHD5	(ENSG00000116254)
			CPAMD8	(ENSG00000160111)
			CYTH1	(ENSG00000108669)
			ENOSF1	(ENSG00000132199)
			FRMD4A	(ENSG00000151474)
			GFPT2	(ENSG00000131459)
			GPSM2	(ENSG00000121957)
			HYI	(ENSG00000178922)
			KIRREL1	(ENSG00000183853)
			KLHL14	(ENSG00000197705)
			LSS	(ENSG00000160285)
			NOVA2	(ENSG00000104967)
			SDC3	(ENSG00000162512)
			SLC25A10	(ENSG00000183048)
			SOD2	(ENSG00000112096)
			TMEM201	(ENSG00000188807)
			TNFAIP2	(ENSG00000185215)
			TSEN54	(ENSG00000182173)

## Sheet: category 3
	Suppl. 2: The list of all human genes and their Ensembl gene ID, which contained human-specific TRs in their TIS-flanking sequence for categories 3.
			Gene Name	Ensemble Gene ID
			ABHD3	ENSG00000158201
			AC241401.1	ENSG00000283826
			AC241410.1	ENSG00000288373
			AC241640.2	ENSG00000283892
			AC256236.1	ENSG00000284330
			ADCY3	ENSG00000138031
			ALAS2	ENSG00000158578
			AMOT	ENSG00000126016
			ANKRD17	ENSG00000132466
			APTX	ENSG00000137074
			ATOX1	ENSG00000177556
			C8orf33	ENSG00000182307
			CBR4	ENSG00000145439
			CCAR1	ENSG00000060339
			CES4A	ENSG00000172824
			CHMP2B	ENSG00000083937
			CLEC2D	ENSG00000069493
			CNTNAP3B	ENSG00000154529
			COMMD1	ENSG00000173163
			CPSF1	ENSG00000071894
			CPSF1	ENSG00000285049
			DGKQ	ENSG00000145214
			DISP1	ENSG00000154309
			DNAI1	ENSG00000122735
			DNAJA4	ENSG00000140403
			ECHDC3	ENSG00000134463
			FAM189A2	ENSG00000135063
			FAM50A	ENSG00000071859
			FAM90A1	ENSG00000171847
			FAM90A10P	ENSG00000285950
			FAM90A14P	ENSG00000285814
			FAM90A16P	ENSG00000285620
			FAM90A17P	ENSG00000285720
			FAM90A18P	ENSG00000285913
			FAM90A19P	ENSG00000285657
			FAM90A22P	ENSG00000285687
			FAM90A23P	ENSG00000285795
			FAM90A23P	ENSG00000285765
			FAM90A7P	ENSG00000285832
			FAM90A7P	ENSG00000285975
			FAM90A8P	ENSG00000285937
			FAM90A9P	ENSG00000285607
			FAM90A9P	ENSG00000285962
			FTSJ3	ENSG00000108592
			GFPT2	ENSG00000131459
			GRP	ENSG00000134443
			HAGHL	ENSG00000103253
			HSPG2	ENSG00000142798
			KRT10	ENSG00000186395
			KRTAP10-1	ENSG00000215455
			KRTAP10-10	ENSG00000221859
			KRTAP10-3	ENSG00000212935
			MALRD1	ENSG00000204740
			MFAP3L	ENSG00000198948
			MIA3	ENSG00000154305
			NAT1	ENSG00000171428
			NFE2L1	ENSG00000082641
			NOTUM	ENSG00000185269
			NUDT11	ENSG00000196368
			PABPC1L2A	ENSG00000186288
			PAOX	ENSG00000148832
			PCSK6	ENSG00000140479
			PDXK	ENSG00000160209
			PELI2	ENSG00000139946
			PGAP6	ENSG00000129925
			PHLDA2	ENSG00000274538
			PHLDA2	ENSG00000181649
			PLA2G2A	ENSG00000188257
			PLEC	ENSG00000178209
			PNLDC1	ENSG00000146453
			PSORS1C1	ENSG00000235487
			PSORS1C1	ENSG00000233439
			PSORS1C1	ENSG00000231094
			PSORS1C1	ENSG00000233734
			PSORS1C1	ENSG00000206458
			RAB11FIP4	ENSG00000131242
			RAET1G	ENSG00000203722
			RAP1GAP2	ENSG00000132359
			RBPJ	ENSG00000168214
			RFLNB	ENSG00000283979
			RFLNB	ENSG00000183688
			RMDN2	ENSG00000115841
			SCYGR1	ENSG00000284629
			SHOX2	ENSG00000168779
			SLC12A4	ENSG00000124067
			SLC36A1	ENSG00000123643
			SLC66A3	ENSG00000162976
			SLIT2	ENSG00000145147
			SMIM27	ENSG00000235453
			SPDL1	ENSG00000040275
			SPDYE4	ENSG00000183318
			STAR	ENSG00000147465
			STX3	ENSG00000166900
			SYNGAP1	ENSG00000227460
			TAZ	ENSG00000102125
			TBC1D9B	ENSG00000197226
			TOM1L1	ENSG00000141198
			UBXN2A	ENSG00000173960
			ULK1	ENSG00000177169
			WNK2	ENSG00000165238
			ZNF827	ENSG00000151612

## Sheet: category 4
	Suppl. 2: The list of all human genes and their Ensembl gene ID, which contained human-specific TRs in their TIS-flanking sequence for categories 4.
			Gene Name	Ensemble Gene ID
			AC275284.2	ENSG00000288173
			AC275284.4	ENSG00000288440
			ADSS1	ENSG00000185100
			AS3MT	ENSG00000214435
			ASPSCR1	ENSG00000169696
			BAG1	ENSG00000107262
			BTBD2	ENSG00000133243
			COL4A2	ENSG00000134871
			CRY2	ENSG00000121671
			CTDSPL	ENSG00000144677
			DNAJC7	ENSG00000168259
			EIF4A3	ENSG00000141543
			FAM50A	ENSG00000071859
			FMR1NB	ENSG00000176988
			FP565260.3	ENSG00000277117
			GIMAP1	ENSG00000213203
			GIMAP1-GIMAP5	ENSG00000281887
			GIPR	ENSG00000010310
			GOLGA6L1	ENSG00000288214
			GOLGA6L22	ENSG00000277865
			GOLGA6L22	ENSG00000274404
			HMGN1	ENSG00000205581
			ICOSLG	ENSG00000160223
			INAFM1	ENSG00000257704
			KRTAP22-1	ENSG00000186924
			L3MBTL1	ENSG00000185513
			LMF1	ENSG00000103227
			MKI67	ENSG00000148773
			MPND	ENSG00000008382
			NAA16	ENSG00000172766
			NHP2	ENSG00000145912
			NME4	ENSG00000103202
			NODAL	ENSG00000156574
			NPRL3	ENSG00000103148
			PDE4D	ENSG00000113448
			PLXNB3	ENSG00000198753
			POLR1B	ENSG00000125630
			PPP1CC	ENSG00000186298
			PSEN2	ENSG00000143801
			RFLNB	ENSG00000283979
			RFLNB	ENSG00000183688
			RPA4	ENSG00000204086
			RUFY1	ENSG00000284260
			SCPEP1	ENSG00000121064
			SMTNL2	ENSG00000188176
			TARM1	ENSG00000276355
			TENT5A	ENSG00000112773
			TONSL	ENSG00000160949
			TP53	ENSG00000141510
			TP53I3	ENSG00000115129
			TTYH2	ENSG00000141540
			TYMS	ENSG00000176890
			UBE2Q2	ENSG00000140367
			YY2	ENSG00000230797
