# Supplementary material for: Tandem repeats ubiquitously flank and select translation initiation sites.
Source: Research Square preprint supplement (doi:10.21203/rs.3.rs-832312/v1), 2021-08-31
Supplement: Supplementary file 3 [file 9e0502ca344b7d70fb0bf2c2.xlsx]

## Sheet: Suppl. 1
			Suppl. 1: The number of genes, transcripts and extracted TRs for each species in our study. The rows of the table are sorted from large to small, based on the ratio of the number of TRs to the number of genes and transcripts in each species.
				Species Name	Gene Count	Transcript Count	TR Count
			1	Platypus	17417	32879	66870
			2	Zebra finch	16619	32042	59396
			3	Mallard	16765	27177	47975
			4	Channel catfish	23598	37418	63164
			5	Atlantic salmon	47233	120810	165910
			6	Dingo	21307	34409	54877
			7	Live sharksucker	21616	54972	74213
			8	Dog	20199	44968	61396
			9	Duck	16616	27775	41764
			10	Chicken	16779	28289	40517
			11	Cat	19563	40213	52683
			12	Koala	19832	37853	50665
			13	Kakapo	16037	24466	35395
			14	Lamprey	10415	11407	18962
			15	Central bearded dragon	19580	35125	47320
			16	Argentine black and white tegu	19338	30824	43195
			17	Horse	20912	44821	56411
			18	Human	22791	93706	99818
			19	Tropical clawed frog	19983	54781	63621
			20	Japanese quail	15732	27830	37006
			21	Mouse Lemur	18816	37936	47774
			22	Fugu	21383	52143	60287
			23	Pig	21280	49765	58025
			24	Emu	15615	27632	34984
			25	Hagfish	16513	27904	35440
			26	Red-bellied piranha	26675	37847	51388
			27	Chimpanzee	23302	49639	57821
			28	Macaque	21591	48528	55342
			29	Red fox	20266	40919	47854
			30	Mouse	22287	60199	64109
			31	Olive baboon	21464	44926	51556
			32	Painted turtle	21176	39003	46072
			33	Opossum	21380	36481	44229
			34	Donkey	19922	33664	40817
			35	Shrew mouse	19440	43293	47429
			36	Leopard	19646	29714	36735
			37	Marmoset	22509	42818	48166
			38	Cod	20095	22033	31022
			39	Australian saltwater crocodile	15226	27680	31493
			40	Tuatara	17628	25181	31410
			41	Arabian camel	19379	32915	38314
			42	Rabbit	20599	40973	44786
			43	Drosophila melanogaster	13947	30541	32351
			44	Goat	21343	33824	39848
			45	Cow	21861	37446	42784
			46	Gorilla	21587	44915	47865
			47	Guppy	22857	34256	40392
			48	Agassiz's desert tortoise	20135	34259	38254
			49	Anole lizard	18595	19114	26270
			50	Gibbon	20648	40312	42181
			51	Kangaroo rat	16911	23905	28097
			52	Bonobo	21041	42992	43685
			53	Common canary	15225	24230	25944
			54	Golden Hamster	18257	25849	27907
			55	Polar bear	18699	33964	32977
			56	Tarsier	18304	31635	31110
			57	Prairie vole	19130	27547	28846
			58	Degu	19982	26980	28765
			59	Tasmanian devil	18788	22341	25038
			60	Guinea Pig	18095	25521	26440
			61	Budgerigar	14568	22523	22436
			62	Squirrel	18474	25896	26379
			63	Elephant	20033	25568	26941
			64	Rat	22250	28862	30166
			65	Armadillo	22711	26475	28779
			66	Wallaby	15290	15291	17647
			67	Wild yak	20832	34593	31606
			68	Vervet-AGM	19165	19191	21711
			69	Hedgehog	14601	14556	16370
			70	Orangutan	20424	21345	23114
			71	Megabat	16990	16996	18743
			72	Microbat	19728	20653	22110
			73	Tiger	17544	26789	23810
			74	Dolphin	16550	16555	17494
			75	Shrew	13187	13148	13873
			76	Panda	19343	21071	21037
			77	Ferret	19910	19995	20759
			78	Bushbaby	19506	19920	20429
			79	Lesser hedgehog tenrec	16575	16519	17022
			80	Turkey	14123	16446	15472
			81	Pika	16006	15952	16124
			82	Alpaca	11765	11766	10993
			83	Tree Shrew	15471	15423	14387
			84	Sloth	12393	12393	11404
				Total	1611368	2730515	3283771
